# Supplementary material for: Sensitivity Analysis of the Climate Effect of Using Pyrochar Biofuel for Heat and Electricity Generation
Source: MDPI journal article supplement (doi:10.3390/pr9101744), 2021-09-29
Supplement: s1 [file s1]

Supplementary information to

## Sensitivity Analysis of the Climate Effect of Using Pyrochar Biofuel for Heat and Electricity Generation

This supporting information contains 2 tables presenting chemical properties of sludge and pyrochar, as well as transfer coefficients to processes, and 6 figures demonstrating the sensitivity of climate change impact of Pyrochar Scenario to various parameters.

**Table S1.** Major chemical elements (% dry matter) in pulp and paper mill sludge (mixed fibre sludge and biosludge) and pyrochar [1-3].

| Elements       | Sludge | Pyrochar |
|----------------|--------|----------|
| Nitrogen (N)   | 3.15   | 1.41     |
| Phosphorus (P) | 0.44   | 0.04     |
| Potassium (K)  | 0.16   | 0.05     |
| Magnesium (Mg) | 0.13   | 0.3      |
| Calcium (Ca)   | 11.58  | 10.4     |
| Carbon (C)     | 46.4   | 49.79    |
| Oxygen (O)     | 29.2   | 32       |
| Sulphur (S)    | 1.48   | 0.52     |
| Hydrogen (H)   | 6.0    | 4.37     |
| Chlorine (Cl)  | 0.02   | 0.01     |

**Table S2.** Transfer coefficients (TC) for pyrochar application in combined heat and power plants.

| Process           | Material              | TC [%] |
|-------------------|-----------------------|--------|
| Dewatering        | Biosludge             | 5.7    |
|                   | Carbon                | 100    |
| Drying            | Biosludge             | 40.7   |
|                   | Carbon                | 100    |
| Pyrolysis         | Biosludge to Pyrochar | 30.3   |
|                   | Carbon                | 38.5   |
| Combustion in CHP | Pyrochar to Ash       | 33     |
|                   | Carbon                | 6.3    |

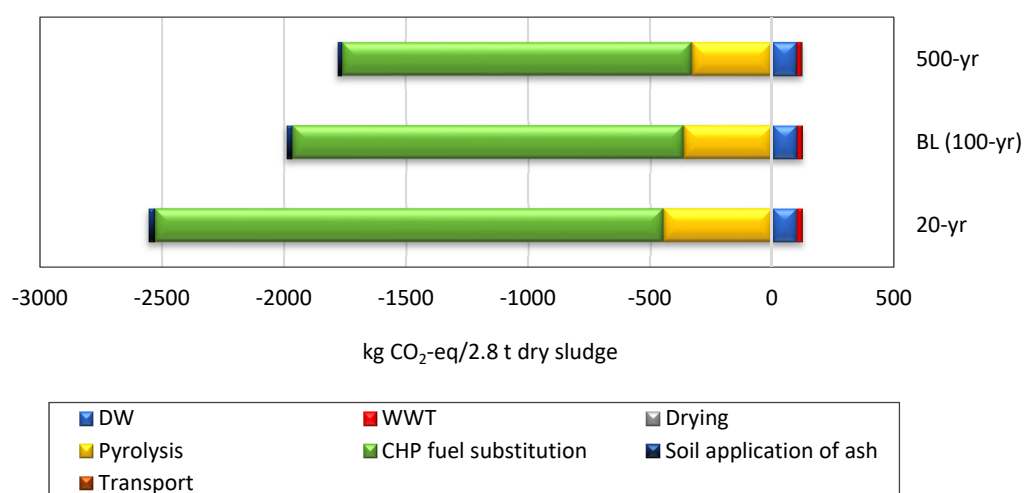

**Figure S1.** Sensitivity of climate impact of Pyrochar Scenario calculated based on time horizon of 20-, 100- (baseline-BS) and 500-year.

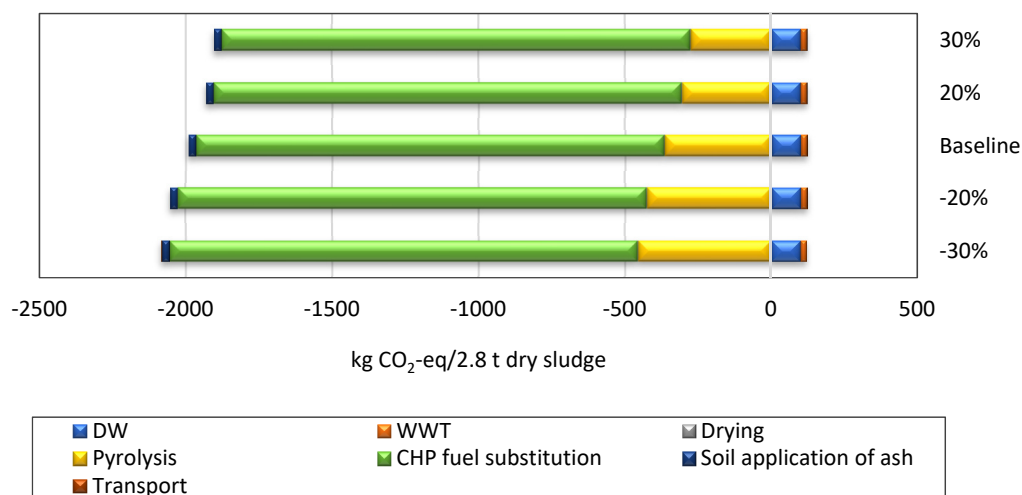

**Figure S2.** Sensitivity of the GHG emissions abatement of Pyrochar Scenario to the rate of energy recovery through incineration process in Reference Scenario (the baseline value is increased/decreased by  $\pm 20\%$  and  $\pm 30\%$ ).

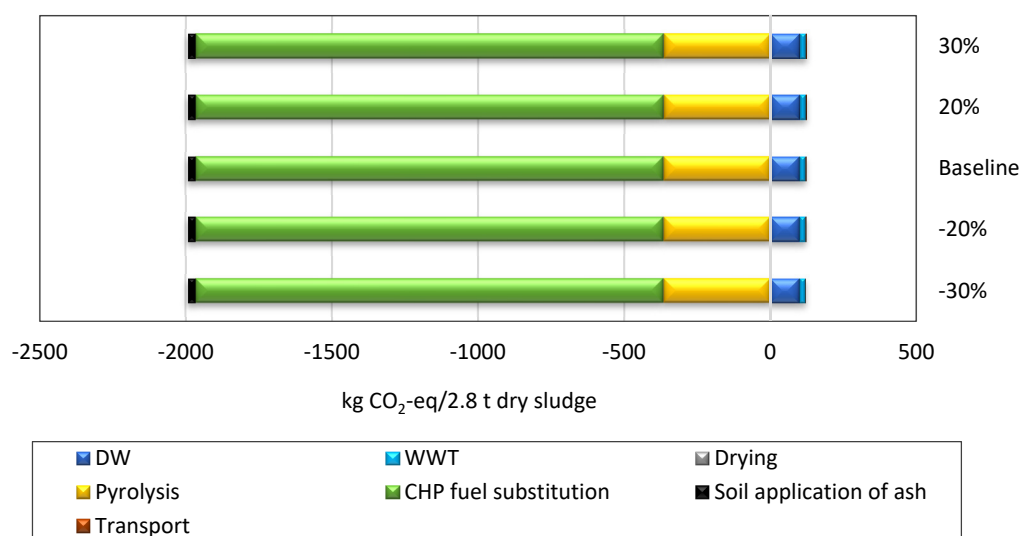

**Figure S3.** Sensitivity of the GHG emissions abatement of Pyrochar Scenario to the transport distance (the baseline value is increased/decreased by  $\pm 20\%$  and  $\pm 30\%$ ).

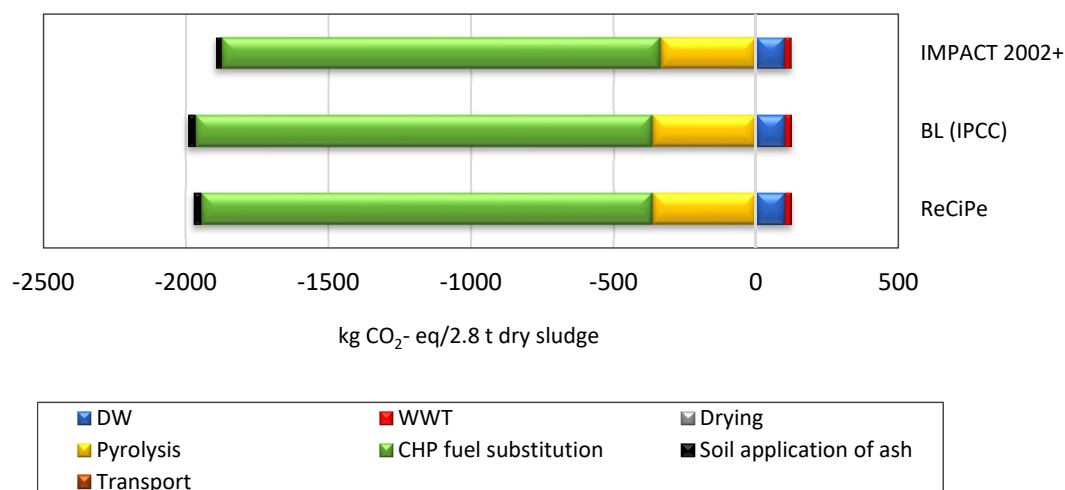

**Figure S4.** Sensitivity of the climate impact of Pyrochar Scenario to the impact assessment methods (IMPACT 2002+ and ReCiPe Midpoint).

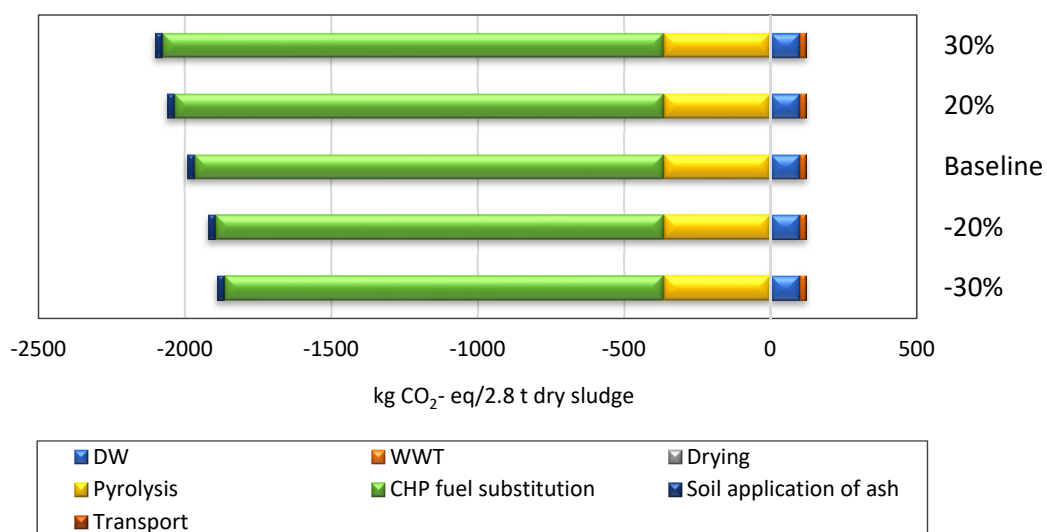

**Figure S5.** Sensitivity of the climate effect of Pyrochar Scenario to the electricity conversion efficiency in CHP plant (the baseline value is changed by  $\pm 20\%$  and  $\pm 30\%$ ).

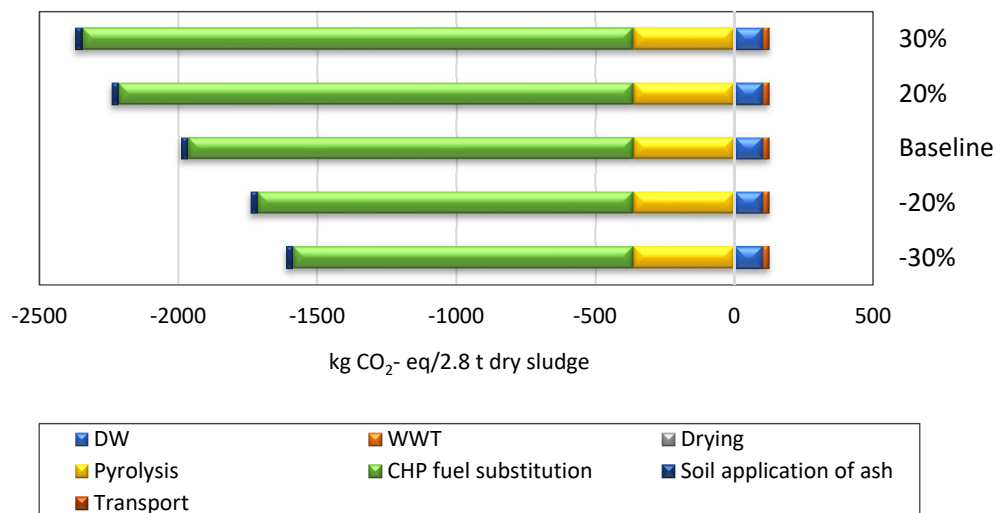

**Figure S6.** Sensitivity of the climate change impact of Pyrochar Scenario to the heat conversion efficiency in CHP plant (the baseline value is changed by  $\pm 20\%$  and  $\pm 30\%$ ).

## References

- [1] Ahlroth, M.; Bialik, M.; Jensen, A. Hydrothermal carbonization of pulp- and paper mill effluent sludge. Åforsk project 15–489, **2017**, ÅForsk Foundation: Stockholm, Sweden.
- [2] Rasa, K.; Pennanen, T.; Peltoniemi, K.; Velmala, S.; Fritze, H.; Kaseva, J.; Joona, J.; Uusitalo, R. Pulp and Paper Mill Sludges Decrease Soil Erodibility. *J. Environ. Qual.* **2021**, 50, 172–184.
- [3] Mohammadi, A. Biochar pellets, a soil nutritional and liming agent or a source of energy: effects of ash and lignin on the physical and chemical properties. Åforsk project 19-622, **2021**, ÅForsk Foundation: Stockholm, Sweden.
