# Supplementary material for: Sensitivity Analysis of the Climate Effect of Using Pyrochar Biofuel for Heat and Electricity Generation
Source: MDPI journal article supplement (doi:10.3390/pr9101744), 2021-09-29
Supplement: s1 [file s1]

Archive with 1 entries (1 files):
- processes-1377549-supplementary.pdf
